# Supplementary material for: Characterization of binding, functional activity, and contractile responses of the selective 5‐HT1F receptor agonist lasmiditan
Source: PubMed Central journal article supplement (PMC6965684; doi:10.1111/bph.14832), 2019-11-07
Supplement: BPH-176-4681-s001.pdf [file BPH-176-4681-s001.pdf]

## Supplementary material

**Supplementary Table 1.** Reference tracers (concentration, nM), and reference competitors used for radioligand binding competition assays for the different receptors studied. \*Historical pIC<sub>50</sub> values obtained at Ogeda S.A. (now Epics Therapeutics S.A., Gosselies, Belgium). Values represent mean values ± SEM of a stated number of averaged technical duplicates (n).

| Receptor           | Reference tracer             | Assay concentration (nM) | Reference competitor | Historical* pIC <sub>50</sub> (reference competitor) | Estimated pIC <sub>50</sub> (reference competitor) | pK <sub>i</sub> (reference competitor) |
|--------------------|------------------------------|--------------------------|----------------------|------------------------------------------------------|----------------------------------------------------|----------------------------------------|
| 5-HT <sub>1A</sub> | [ <sup>3</sup> H]-8-OH-DPAT  | 0.39                     | 5-HT hydrochloride   | 8.83 ± 0.04 (23)                                     | 9.00 ± 0.06 (2)                                    | 9.51 ± 0.06 (2)                        |
| 5-HT <sub>1B</sub> | [ <sup>3</sup> H]-5-CT       | 0.60                     | 5-HT hydrochloride   | 8.42 ± 0.10 (8)                                      | 8.61 ± 0.19 (2)                                    | 9.09 ± 0.19 (2)                        |
| 5-HT <sub>1D</sub> | [ <sup>3</sup> H]-5-CT       | 0.50                     | 5-HT hydrochloride   | 8.35 ± 0.08 (7)                                      | 8.67 ± 0.18 (2)                                    | 9.35 ± 0.18 (2)                        |
| 5-HT <sub>1E</sub> | [ <sup>3</sup> H]-LSD        | 14.0                     | BRL-54443            | 8.49 ± 0.09 (5)                                      | 8.44 ± 0.07 (3)                                    | 8.74 ± 0.07 (3)                        |
| 5-HT <sub>1F</sub> | [ <sup>3</sup> H]-LSD        | 8.00                     | BRL-54443            | 8.59 ± 0.17 (5)                                      | 8.54 ± 0.12 (3)                                    | 8.96 ± 0.12 (3)                        |
| 5-HT <sub>2A</sub> | [ <sup>3</sup> H]-Ketanserin | 1.48                     | Ketanserin           | 8.22 ± 0.18 (6)                                      | 8.17 ± 0.04 (2)                                    | 8.69 ± 0.04 (2)                        |
| 5-HT <sub>2B</sub> | [ <sup>3</sup> H]-Mesulergin | 1.00                     | 5-HT hydrochloride   | 7.67 ± 0.09 (8)                                      | 7.68 ± 0.05 (3)                                    | 7.89 ± 0.05 (3)                        |
| 5-HT <sub>7</sub>  | [ <sup>3</sup> H]-LSD        | 1.00                     | 5-CT maleate         | 9.28 ± 0.05 (13)                                     | 9.42 ± 0.17 (3)                                    | 9.51 ± 0.17 (3)                        |

**Supplementary Table 2.** Reference agonists for second messenger activation assays of cAMP (5-HT<sub>1A/B/E/F</sub> and 5-HT<sub>7</sub>), GTPγS (5-HT<sub>1D</sub>) and IP (5-HT<sub>2A/B</sub>). \*Historical pEC<sub>50</sub> values obtained at Ogeda S.A. (now Epics Therapeutics S.A., Gosselies, Belgium). Values represent mean values ± SEM of a stated number of averaged technical duplicates (n).

| Receptor           | Reference agonist  | Historical* pEC <sub>50</sub> cAMP/IP/ GTPγS | Estimated pEC <sub>50</sub> cAMP/IP/ GTPγS |
|--------------------|--------------------|----------------------------------------------|--------------------------------------------|
| 5-HT <sub>1A</sub> | 5-CT maleate       | 9.18 ± 0.05 (35)                             | 9.02 ± 0.17 (4)                            |
| 5-HT <sub>1B</sub> | 5-CT maleate       | 8.78 ± 0.07 (23)                             | 8.80 ± 0.01 (2)                            |
| 5-HT <sub>1D</sub> | 5-CT maleate       | 9.30 ± 0.05 (21)                             | 9.26 ± 0.13 (3)                            |
| 5-HT <sub>1E</sub> | 5-HT hydrochloride | 9.00 ± 0.16 (2)                              | 8.61 ± 0.05 (3)                            |
| 5-HT <sub>1F</sub> | 5-HT hydrochloride | 8.94 ± 0.15 (7)                              | 8.69 ± 0.16 (3)                            |
| 5-HT <sub>2A</sub> | α-Me-5-HT          | 8.68 ± 0.05 (31)                             | 8.33 ± 0.06 (2)                            |
| 5-HT <sub>2B</sub> | α-Me-5-HT          | 9.70 ± 0.09 (28)                             | 9.63 ± 0.08 (2)                            |
| 5-HT <sub>7</sub>  | 5-CT maleate       | 9.59 ± 0.03 (45)                             | 9.62 ± 0.01 (3)                            |

**Supplementary Table 3.** Summary of pEC<sub>50</sub> values of vasoconstriction of the human coronary artery. These values represent the negative logarithm of the molar concentration of these compounds at which 50% of their maximal response was exerted. When a compound was devoid of vasoconstrictor activity, a pEC<sub>50</sub> of 5 was set.

| Agonist                   | pEC <sub>50</sub> | Reference                                                                        |
|---------------------------|-------------------|----------------------------------------------------------------------------------|
| 5-HT hydrochloride        | 6.50              | (MaassenVanDenBrink, Reekers, Bax, Ferrari & Saxena, 1998; Parsons et al., 1998) |
| 5-CT maleate              | 6.44              | (MaassenVanDenBrink, Reekers, Bax & Saxena, 2000)                                |
| Ergotamine tartrate       | 7.81              | (MaassenVanDenBrink, Reekers, Bax, Ferrari & Saxena, 1998)                       |
| Sumatriptan succinate     | 6.11              | (MaassenVanDenBrink, Reekers, Bax, Ferrari & Saxena, 1998)                       |
| Zolmitriptan              | 6.33              | (MaassenVanDenBrink, Reekers, Bax, Ferrari & Saxena, 1998)                       |
| Naratriptan hydrochloride | 6.78              | (MaassenVanDenBrink, Reekers, Bax, Ferrari & Saxena, 1998)                       |
| Rizatriptan benzoate      | 6.36              | (MaassenVanDenBrink, Reekers, Bax, Ferrari & Saxena, 1998)                       |
| Eletriptan hydrobromide   | 5.54              | (van den Broek et al., 2000)                                                     |
| Frovatriptan Racemate     | 7.86              | (Parsons et al., 1998)                                                           |
| Donitriptan hydrochloride | 8.25              | (van den Broek et al., 2002)                                                     |
| Avitriptan fumarate       | 7.06              | (MaassenVanDenBrink, Reekers, Bax, Ferrari & Saxena, 1998; Saxena et al., 1997)  |
| Lasmiditan hemisuccinate  | 5.00              |                                                                                  |

**Supplementary Table 4.** Comparison pIC<sub>50</sub> (negative logarithm of the molar concentration of these compounds at which 50% of the radioligand is displaced) and pK<sub>i</sub> (negative logarithm of the molar concentration of the dissociation constant) values of individual antimigraine drugs at 5-HT<sub>1A/B/D/E/F</sub>, 5-HT<sub>2A/B</sub> and 5-HT<sub>7</sub> receptors obtained in our study and values reported in the literature (Lit.) obtained from Adham et al., 1993a; Adham et al., 1993b; Bard, Kucharewicz, Zgombick, Weinshank, Branchek & Cohen, 1996; Barf et al., 1996; Beer, Heald, McAllister & Stanton, 1998; Bhalla, Sharma, Ma, Wurch, Pauwels & Saxena, 2001; Bou et al., 2000; Brüß, Kiel, Bönisch, Kostanian & Göthert, 2005; Castro et al., 1997; Choi et al., 2008; Comer & Hons, 2002; Connor et al., 1997; Deleu & Hanssens, 2000; Dickenson & Hill, 1998; Dupuis, Perez, Halazy, Colpaert & Pauwels, 1999; Ghoneim, Ibrahim, El-Deeb, Lee & Booth, 2011; Glennon et al., 2000; Goadsby, 1998; Gras, Llenas, Jansat, Jáuregui, Cabarrocas & Palacios, 2002; Hoyer, 1988; John et al., 1999; Johnson et al., 1997; Knight et al., 2004; Leonhardt, Herrick-Davis & Titeler, 1989; Leysen et al., 1996; Lovenberg et al., 1993; Martin et al., 1997; McAllister et al., 1992; Napier, Stewart, Melrose, Hopkins, McHarg & Wallis, 1999; Nelson et al., 2010; Newman-Tancredi et al., 1997; Pauwels, Palmier, Dupuis & Colpaert, 1998; Pauwels, Palmier, Wurch & Colpaert, 1996; Pauwels, Tardif, Palmier, Wurch & Colpaert, 1997; Phebus et al., 1997; Razzaque et al., 1999; Schmuck, Ullmer, Kalkman, Probst & Lübbert, 1996; Shen, Monsma, Metcalf, Jose, Hamblin & Sibley, 1993; Stanton & Beer, 1997; Sternfeld et al., 1999; Street et al., 1995; Vries, Villalón & Saxena, 1999; Wang et al., 2013; Wurch, Palmier & Pauwels, 2000; Xu et al., 1999; Zgombick, Schechter, Macchi, Hartig, Branchek & Weinshank, 1992; Zgombick, Weinshank, Macchi, Schechter, Branchek & Hartig, 1991; Zhang et al., 2004.

| Agonist                   | 5-HT <sub>1A</sub> |      |                 |      | 5-HT <sub>1B</sub> |      |                 |      | 5-HT <sub>1D</sub> |      |                 |      | 5-HT <sub>1E</sub> |      |                 |      | 5-HT <sub>1F</sub> |      |                 |      | 5-HT <sub>2A</sub> |      |                 |      | 5-HT <sub>2B</sub> |      |                 |      | 5-HT <sub>7</sub> |      |                 |      |      |
|---------------------------|--------------------|------|-----------------|------|--------------------|------|-----------------|------|--------------------|------|-----------------|------|--------------------|------|-----------------|------|--------------------|------|-----------------|------|--------------------|------|-----------------|------|--------------------|------|-----------------|------|-------------------|------|-----------------|------|------|
|                           | pIC <sub>50</sub>  |      | pK <sub>i</sub> |      | pIC <sub>50</sub>  |      | pK <sub>i</sub> |      | pIC <sub>50</sub>  |      | pK <sub>i</sub> |      | pIC <sub>50</sub>  |      | pK <sub>i</sub> |      | pIC <sub>50</sub>  |      | pK <sub>i</sub> |      | pIC <sub>50</sub>  |      | pK <sub>i</sub> |      | pIC <sub>50</sub>  |      | pK <sub>i</sub> |      | pIC <sub>50</sub> |      | pK <sub>i</sub> |      |      |
|                           | Our                | Lit. | Our             | Lit. | Our                | Lit. | Our             | Lit. | Our                | Lit. | Our             | Lit. | Our                | Lit. | Our             | Lit. | Our                | Lit. | Our             | Lit. | Our                | Lit. | Our             | Lit. | Our                | Lit. | Our             | Lit. | Our               | Lit. | Our             | Lit. |      |
| Ergotamine tartrate       | 9.19               | 9.11 | 9.70            | 9.17 | 8.87               | -    | 9.34            | 8.45 | 8.63               | -    | 9.31            | 9.20 | 6.08               | -    | 6.39            | 7.07 | 6.71               | -    | 7.13            | 6.78 | 7.62               | 8.19 | 8.14            | 9.01 | 7.73               | 8.46 | 7.94            | 8.71 | 7.13              | 7.49 | 7.23            | 7.49 |      |
| Sumatriptan succinate     | 6.63               | 6.32 | 7.14            | 6.53 | 7.81               | 8.12 | 8.29            | 7.92 | 8.31               | 7.98 | 9.00            | 8.32 | 5.42               | 5.40 | 5.72            | 5.83 | 7.13               | 7.70 | 7.55            | 7.67 | <5                 | <5   | <5              | <5   | <5                 | <5   | <5              | <5   | <5                | 6.10 | 5.44            | 6.19 | 6.23 |
| Zolmitriptan              | 7.28               | 6.50 | 7.79            | 7.26 | 8.85               | 8.21 | 9.33            | 8.33 | 9.28               | 8.75 | 9.97            | 9.19 | 7.51               | -    | 7.81            | 7.84 | 7.13               | 7.27 | 7.55            | 7.39 | <5                 | <5   | <5              | <5   | <5                 | <5   | <5              | <5   | -                 | 6.97 | -               | 7.06 | 7.01 |
| Naratriptan hydrochloride | 7.31               | 6.90 | 7.82            | 7.29 | 8.75               | -    | 9.22            | 8.69 | 8.62               | -    | 9.30            | 8.83 | 7.83               | -    | 8.13            | 7.61 | 8.33               | -    | 8.75            | 8.31 | <5                 | -    | <5              | <5   | <5                 | -    | 5.08            | -    | 5.84              | -    | 5.93            | 5.5  |      |
| Rizatriptan benzoate      | 6.81               | 6.50 | 7.32            | 6.48 | 7.51               | 7.39 | 7.99            | 7.63 | 8.15               | 7.63 | 8.83            | 8.17 | 6.48               | -    | 6.78            | 6.78 | 6.40               | -    | 6.82            | 6.71 | <5                 | 5.20 | <5              | <5   | 5.30               | -    | 5.51            | 6.59 | <5                | -    | <5              | 5.73 |      |
| Almotriptan malate        | 6.23               | 6.07 | 6.73            | 6.30 | 7.97               | 7.92 | 8.45            | 7.60 | 7.57               | 7.89 | 8.26            | 7.90 | <5                 | -    | <5              | -    | 7.15               | 7.30 | 7.57            | 7.10 | <5                 | <5   | <5              | <5   | <5                 | <5   | <5              | <5   | 6.36              | 5.50 | 6.46            | 6.5  |      |
| Eletriptan hydrobromide   | 8.20               | -    | 8.71            | 7.38 | 8.80               | -    | 9.28            | 8.00 | 9.31               | -    | 9.99            | 8.92 | 6.91               | -    | 7.21            | 7.33 | 7.35               | -    | 7.77            | 8.01 | 5.42               | -    | 5.94            | <5.5 | 6.14               | -    | 6.35            | -    | 6.61              | -    | 6.70            | 6.7  |      |
| Frovatriptan racemate     | 6.83               | -    | 7.34            | 7.26 | 8.09               | -    | 8.57            | 8.40 | 8.10               | -    | 8.78            | 8.39 | <5                 | -    | 5.18            | -    | 6.50               | -    | 6.92            | 7.00 | <5                 | -    | <5              | 5.30 | <5                 | -    | <5              | -    | 6.88              | -    | 6.97            | 6.70 |      |
| Donitriptan hydrochloride | 7.42               | -    | 7.93            | 7.60 | 9.29               | -    | 9.77            | 9.75 | 9.18               | -    | 9.86            | 9.70 | 5.47               | -    | 5.77            | 5.94 | <5                 | -    | 5.18            | 5.45 | 5.83               | -    | 6.35            | 6.81 | 5.88               | -    | 6.09            | -    | 6.12              | -    | 6.21            | 6.43 |      |
| Avitriptan fumarate       | 7.20               | -    | 7.71            | 7.10 | 8.32               | -    | 8.80            | 7.69 | 8.42               | -    | 9.11            | 8.33 | 5.15               | -    | 5.45            | 6.00 | 6.69               | -    | 7.11            | 6.75 | 5.11               | -    | 5.63            | -    | 5.73               | -    | 5.94            | -    | 6.03              | -    | 6.12            | -    |      |
| Alniditan dihydrochloride | 8.81               | 8.32 | 9.32            | 8.47 | 8.93               | 9.03 | 9.41            | 9.40 | 8.66               | 8.65 | 9.35            | 8.96 | 5.98               | 6.2  | 6.28            | 6.62 | 6.02               | 6.2  | 6.44            | 6.24 | <5                 | <5   | 5.43            | <5   | 6.67               | -    | 6.88            | -    | 7.16              | 6.5  | 7.26            | 6.59 |      |
| Lasmiditan hemisuccinate  | 5.88               | -    | 6.39            | 5.98 | 5.54               | -    | 6.02            | 5.98 | 5.62               | -    | 6.31            | 5.87 | 5.54               | -    | 5.84            | 6.23 | 8.09               | -    | 8.51            | 8.66 | <5                 | -    | <5              | <5   | 5.01               | -    | 5.22            | <5   | <5                | -    | <5              | <5   |      |
| LY334370 hydrochloride    | 7.98               | -    | 8.49            | 7.72 | 6.74               | -    | 7.21            | 6.82 | 6.24               | -    | 6.92            | 6.62 | 6.83               | -    | 7.13            | 6.75 | 9.03               | -    | 9.45            | 8.73 | 5.11               | -    | 5.63            | 5.82 | 5.98               | -    | 6.19            | 5.89 | 5.66              | -    | 5.75            | 5.81 |      |
| LY344864 hydrochloride    | 6.12               | -    | 6.63            | 6.27 | 6.13               | -    | 6.61            | 6.26 | 5.83               | -    | 6.52            | 6.24 | 6.05               | -    | 6.35            | 5.85 | 8.38               | -    | 8.80            | 8.22 | 5.11               | -    | 5.63            | 5.41 | 5.31               | -    | 5.52            | 5.77 | 5.69              | -    | 5.78            | 5.31 |      |

**Supplementary Table 5.** Comparison of pEC<sub>50</sub> values of cAMP (5-HT<sub>1A/B/E/F</sub> and 5-HT<sub>7</sub>), GTPγS (5-HT<sub>1A/B/D/E/F</sub>) and IP (5-HT<sub>2</sub>) assays of individual antimigraine drugs obtained in our study and the historical values reported in the literature (Lit.). These values represent the negative logarithm of the molar concentration of these compounds at which 50% of their maximal response is exerted. The lesser than 5 symbol (<5) indicates that less than 50% response was obtained at 10 μM. Historical values were obtained from Beer, Heald, McAllister & Stanton, 1998; Bhalla, Sharma, Ma, Wurch, Pauwels & Saxena, 2001; Bou et al., 2000; Castro et al., 1997; Dupuis, Perez, Halazy, Colpaert & Pauwels, 1999; John et al., 1999; Johnson et al., 1997; Nelson et al., 2010; Newman-Tancredi et al., 1997; Pauwels, Palmier, Dupuis & Colpaert, 1998; Pauwels, Tardif, Palmier, Wurch & Colpaert, 1997; Razaque et al., 1999; Schmuck, Ullmer, Kalkman, Probst & Lübbert, 1996; Stanton & Beer, 1997; Sternfeld et al., 1999; Wang et al., 2013 and Xu et al., 1999.

| Agonist                   | 5-HT <sub>1A</sub>     |      |                       |      | 5-HT <sub>1B</sub>     |       |                       |      | 5-HT <sub>1D</sub>    |      | 5-HT <sub>1E</sub>     |      |                       |      | 5-HT <sub>1F</sub>     |      |                       |      | 5-HT <sub>2A</sub>   |      | 5-HT <sub>2B</sub>   |      | 5-HT <sub>7</sub>      |      |     |
|---------------------------|------------------------|------|-----------------------|------|------------------------|-------|-----------------------|------|-----------------------|------|------------------------|------|-----------------------|------|------------------------|------|-----------------------|------|----------------------|------|----------------------|------|------------------------|------|-----|
|                           | pEC <sub>50</sub> cAMP |      | pEC <sub>50</sub> GTP |      | pEC <sub>50</sub> cAMP |       | pEC <sub>50</sub> GTP |      | pEC <sub>50</sub> GTP |      | pEC <sub>50</sub> cAMP |      | pEC <sub>50</sub> GTP |      | pEC <sub>50</sub> cAMP |      | pEC <sub>50</sub> GTP |      | pEC <sub>50</sub> IP |      | pEC <sub>50</sub> IP |      | pEC <sub>50</sub> cAMP |      |     |
|                           | Our                    | Lit. | Our                   | Lit. | Our                    | Lit.  | Our                   | Lit. | Our                   | Lit. | Our                    | Lit. | Our                   | Lit. | Our                    | Lit. | Our                   | Lit. | Our                  | Lit. | Our                  | Lit. | Our                    | Lit. | Our |
| Ergotamine tartrate       | 9.78                   | -    | 9.63                  | -    | 9.94                   | 9.58  | 9.52                  | -    | 9.43                  | -    | 5.95                   | -    | 5.74                  | -    | 5.97                   | -    | 6.30                  | -    | 9.25                 | -    | 8.72                 | -    | 7.09                   | -    |     |
| Sumatriptan succinate     | <5                     | <5   | <5                    | 5.34 | 7.32                   | 7.73  | 7.91                  | 6.87 | 8.30                  | 7.76 | 5.99                   | -    | 5.79                  | 5.00 | 8.03                   | 7.46 | 6.80                  | 6.61 | <5                   | <5   | <5                   | 5.18 | 5.22                   | <5   |     |
| Zolmitriptan              | <5                     | -    | 5.52                  | 5.65 | 7.87                   | 7.89  | 8.42                  | 7.43 | 9.51                  | 8.91 | 8.18                   | -    | 7.81                  | 7.21 | 8.00                   | 8.15 | 6.67                  | 6.38 | <5                   | <5   | <5                   | <5   | 6.28                   | 5.30 |     |
| Naratriptan hydrochloride | <5                     | -    | 6.52                  | 5.78 | 8.05                   | 7.805 | 8.86                  | 7.81 | 8.80                  | 8.46 | 7.75                   | -    | 8.17                  | 7.50 | 8.38                   | 8.66 | 8.05                  | 7.71 | <5                   | -    | <5                   | -    | <5                     | -    |     |
| Rizatriptan benzoate      | <5                     | -    | <5                    | 5.44 | 7.08                   | 7.34  | 7.56                  | 6.63 | 8.11                  | 7.89 | 7.34                   | -    | 6.90                  | -    | 6.54                   | 7.60 | 5.91                  | -    | <5                   | -    | 5.49                 | 5.65 | <5                     | -    |     |
| Almotriptan malate        | <5                     | -    | 5.48                  | -    | 7.08                   | 8.80  | 7.85                  | -    | 7.75                  | -    | <5                     | -    | <5                    | -    | 7.79                   | -    | 6.90                  | -    | <5                   | 5    | 5.20                 | <5   | <5                     | -    |     |
| Eletriptan hydrobromide   | 5.74                   | -    | 6.38                  | -    | 8.00                   | 8.44  | 8.09                  | -    | 9.04                  | -    | 7.53                   | -    | 6.90                  | -    | 8.13                   | -    | 6.88                  | -    | 6.07                 | 6.12 | 6.81                 | -    | 6.45                   | -    |     |
| Frovatriptan racemate     | <5                     | -    | 6.12                  | 5.94 | 7.98                   | -     | 8.14                  | 7.70 | 8.36                  | 8.64 | 5.04                   | -    | <5                    | <5   | 7.10                   | -    | 6.35                  | 6.44 | <5                   | -    | <5                   | -    | 7.42                   | -    |     |
| Donitriptan hydrochloride | 5.94                   | -    | 6.74                  | -    | 9.96                   | 9.51  | 9.52                  | 8.74 | 9.51                  | 9.08 | <5                     | -    | <5                    | -    | <5                     | -    | <5                    | -    | 8.10                 | -    | 7.61                 | 6.74 | 5.23                   | -    |     |
| Avitriptan fumarate       | <5                     | -    | 6.19                  | -    | 8.57                   | -     | 8.68                  | -    | 9.27                  | -    | 5.52                   | -    | <5                    | -    | 7.09                   | -    | 6.05                  | -    | 6.91                 | -    | 6.41                 | -    | 5.38                   | -    |     |
| Alniditan dihydrochloride | 7.00                   | -    | 7.29                  | 6.94 | 8.87                   | -     | 8.90                  | -    | 8.20                  | -    | 5.68                   | -    | 5.21                  | -    | 5.92                   | -    | 5.17                  | -    | <5                   | -    | 7.15                 | -    | 6.32                   | -    |     |
| Lasmiditan hemisuccinate  | <5                     | -    | <5                    | <5   | <5                     | -     | <5                    | <5   | 6.64                  | <5   | 6.17                   | -    | 5.34                  | <5   | 8.43                   | -    | 7.80                  | 7.37 | <5                   | -    | <5                   | -    | <5                     | -    |     |
| LY334370 hydrochloride    | 5.84                   | -    | 6.96                  | -    | 6.52                   | -     | 5.80                  | -    | 6.92                  | -    | 7.53                   | -    | 6.95                  | -    | 9.08                   | 8.82 | 9.38                  | -    | <5                   | -    | <5                   | -    | <5                     | -    |     |
| LY344864 hydrochloride    | <5                     | -    | <5                    | -    | <5                     | -     | 5.82                  | -    | 6.93                  | -    | 6.22                   | -    | 6.12                  | -    | 8.72                   | -    | 7.85                  | -    | <5                   | -    | <5                   | -    | <5                     | <5   |     |

**Supplementary Figure 1.** Correlation between the  $pK_i$  values obtained from literature and the  $pK_i$  values obtained in our study for lasmiditan, triptans (sumatriptan, zolmitriptan, naratriptan, rizatriptan, almotriptan, eletriptan, frovatriptan, donitriptan, avitriptan) and other 5-HT receptors ligands (ergotamine, alniditan, 5-HT, 5-carboxamidotryptamine). For references see Supplementary Table 5.

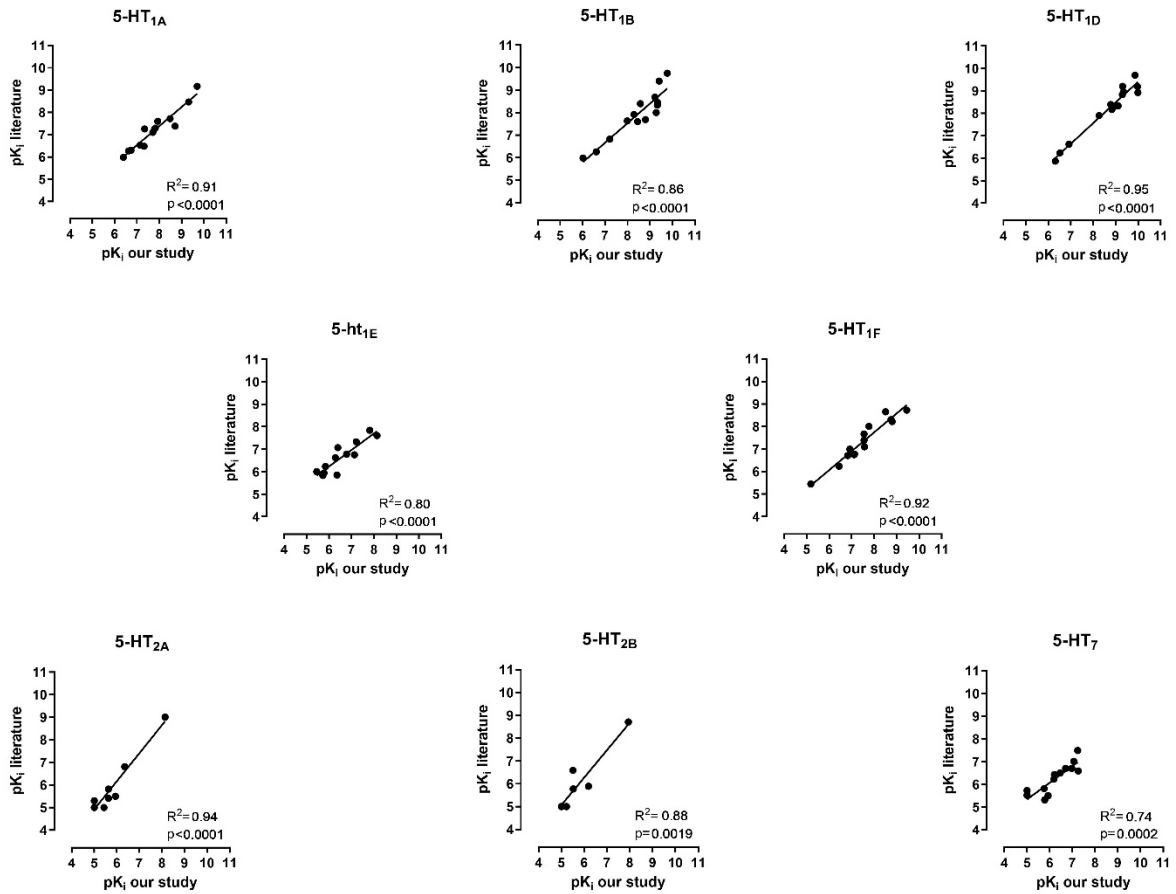

**Supplementary Figure 2.** Functional responses (cAMP assay) to 5-CT in CHO cells transfected with 5-HT<sub>1B</sub> receptor (upper) and in CHO cells transfected with an unrelated G protein-coupled receptor.

5-HT<sub>1B</sub> receptor transfected CHO cells

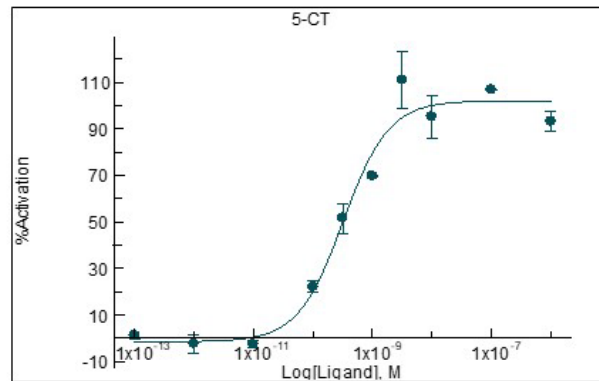

Non-5-HT<sub>1B</sub> receptor transfected CHO cells

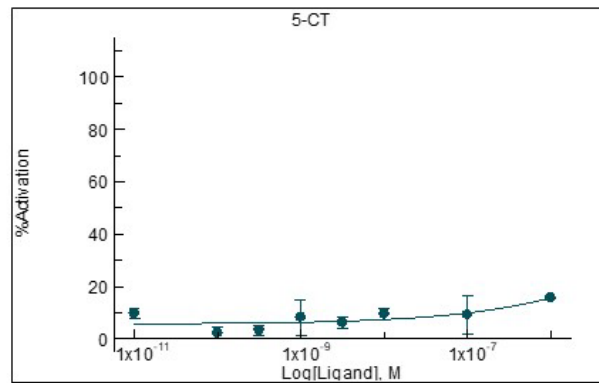

**Supplementary Figure 3.** Correlation between second messenger activation (*i.e.* cAMP, IP) and the contractile potency of lasmiditan, triptans (sumatriptan, zolmitriptan, naratriptan, rizatriptan, almotriptan, eletriptan, frovatriptan, donitriptan, avitriptan) and other 5-HT receptors ligands (ergotamine, 5-HT, 5-CT) in human isolated coronary arteries; N.S., non-significant; \*P<0.05.

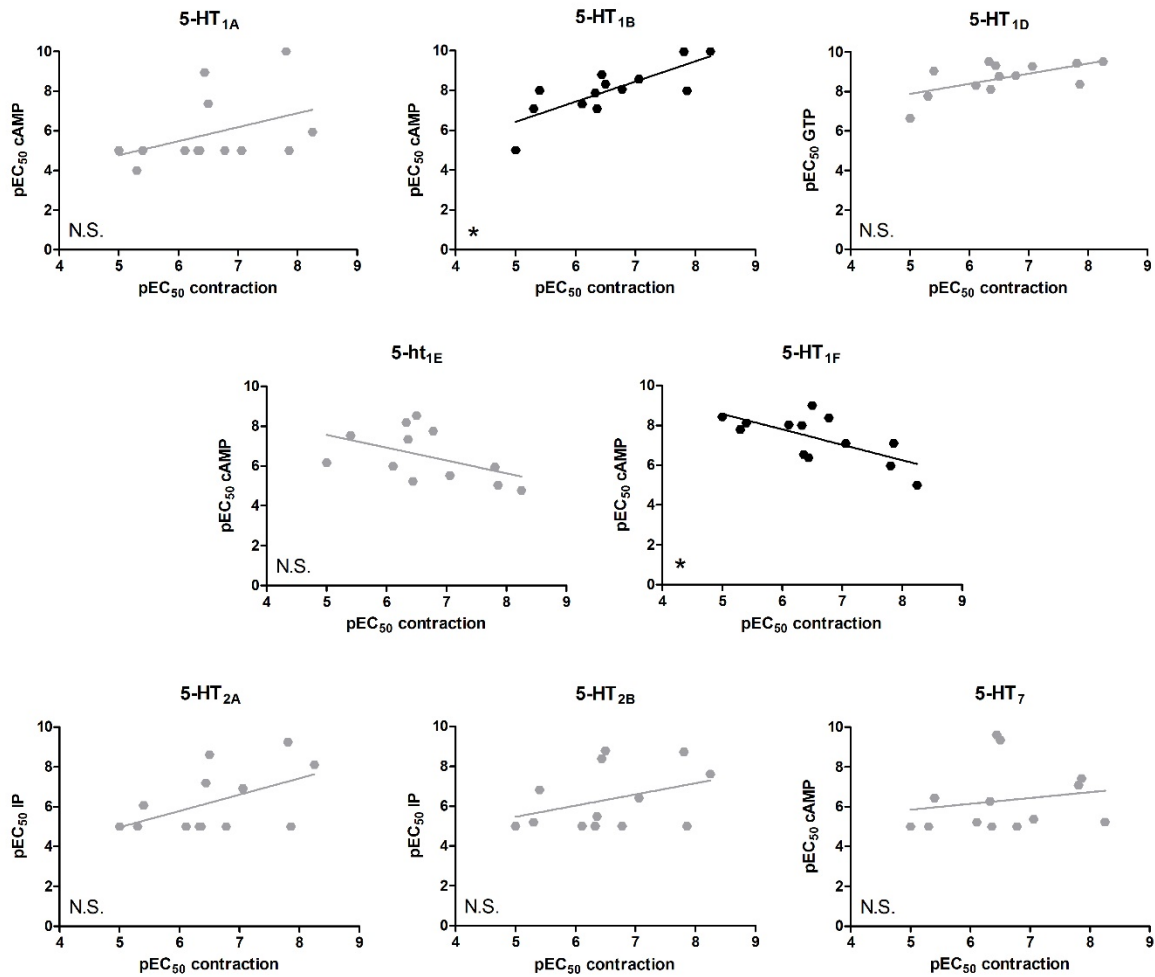

**Supplementary Figure 4.** Correlation between the second messenger activation of 5-HT<sub>1B</sub> receptor vs 5-HT<sub>1F</sub> receptor by lasmiditan, triptans (sumatriptan, zolmitriptan, naratriptan, rizatriptan, almotriptan, eletriptan, frovatriptan, donitriptan, avitriptan) and other 5-HT receptors ligands (ergotamine, 5-HT, 5-carboxamidotryptamine) in human isolated coronary arteries; \*P<0.05.

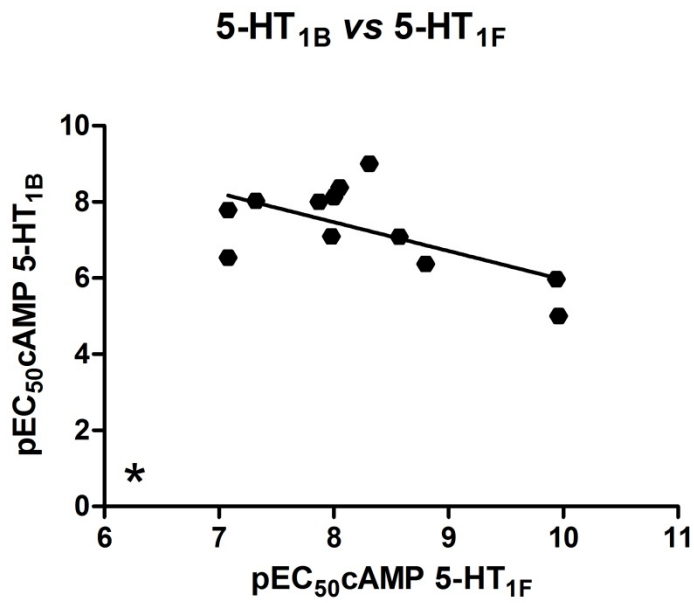



## References

Adham N, Borden LA, Schechter LE, Gustafson EL, Cochran TL, Vaysse PJJ, et al. (1993a). Cell-specific coupling of the cloned human 5-HT<sub>1F</sub> receptor to multiple signal transduction pathways. *Naunyn-Schmiedeberg's Archives of Pharmacology* 348: 566-575.

Adham N, Kao HT, Schechter LE, Bard J, Olsen M, Urquhart D, et al. (1993b). Cloning of another human serotonin receptor (5-HT<sub>1F</sub>): a fifth 5-HT<sub>1</sub> receptor subtype coupled to the inhibition of adenylate cyclase. *Proceedings of the National Academy of Sciences of the United States of America* 90: 408-412.

Bard JA, Kucharewicz SA, Zgombick JM, Weinshank RL, Branchek TA, & Cohen ML (1996). Differences in ligand binding profiles between cloned rabbit and human 5-HT<sub>1D</sub> $\alpha$  and 5-HT<sub>1D</sub> $\beta$  receptors: ketanserin and methiothepin distinguish rabbit 5-HT<sub>1D</sub> receptor subtypes. *Naunyn-Schmiedeberg's Archives of Pharmacology* 354: 237-244.

Barf TA, de Boer P, Wikström H, Peroutka SJ, Svensson K, Ennis MD, et al. (1996). 5-HT<sub>1D</sub> Receptor Agonist Properties of Novel 2-[5-[[[(Trifluoromethyl)sulfonyl]oxy]indolyl]ethylamines and Their Use as Synthetic Intermediates. *Journal of Medicinal Chemistry* 39: 4717-4726.

Beer MS, Heald MA, McAllister G, & Stanton JA (1998). Pharmacological characterisation of a cloned dog 5-HT<sub>1B</sub> receptor cell line. *European Journal of Pharmacology* 360: 117-121.

Bhalla P, Sharma HS, Ma X, Wurch T, Pauwels PJ, & Saxena PR (2001). Molecular cloning, pharmacological properties and tissue distribution of the porcine 5-HT<sub>1B</sub> receptor. *British Journal of Pharmacology* 133: 891-901.

Bou J, Domènech T, Puig J, Heredia A, Gras J, Fernández-Forner D, et al. (2000). Pharmacological characterization of almotriptan: an indolic 5-HT receptor agonist for the treatment of migraine. *European Journal of Pharmacology* 410: 33-41.

van den Broek RWM, MaassenVanDenBrink A, de Vries R, Bogers AJJC, Stegmann APA, Avezaat CJ, et al. (2000). Pharmacological analysis of contractile effects of eletriptan and sumatriptan on human isolated blood vessels. *European Journal of Pharmacology* 407: 165-173.

van den Broek RWM, MaassenVanDenBrink A, Mulder PGH, Bogers AJJC, Avezaat CJJ, John GW, et al. (2002). Comparison of contractile responses to donitriptan and sumatriptan in the human middle meningeal and coronary arteries. *European Journal of Pharmacology* 443: 125-132.

Brüss M, Kiel S, Bönisch H, Kostanian A, & Göthert M (2005). Decreased agonist, but not antagonist, binding to the naturally occurring Thr92Lys variant of the h5-HT7(a) receptor. *Neurochemistry International* 47: 196-203.

Castro JL, Street LJ, Guiblin AR, Jelley RA, Russell MGN, Sternfeld F, et al. (1997). 3-[2-(Pyrrolidin-1-yl)ethyl]indoles and 3-[3-(Piperidin-1-yl)propyl]indoles: Agonists for the h5-HT1D Receptor with High Selectivity over the h5-HT1B Subtype. *Journal of Medicinal Chemistry* 40: 3497-3500.

Choi S-K, Green D, Ho A, Klein U, Marquess D, Taylor R, et al. (2008). Designing Selective, High Affinity Ligands of 5-HT1D Receptor by Covalent Dimerization of 5-HT1F Ligands Derived From 4-Fluoro-N-[3-(1-methyl-4-piperidiny)-1H-indol-5-yl]benzamide. *Journal of Medicinal Chemistry* 51: 3609-3616.

Comer MB, & Hons (2002). Pharmacology of the Selective 5-HT1B/1D Agonist Frovatriptan. *Headache: The Journal of Head and Face Pain* 42: 47-53.

Connor HE, Feniuk W, Beattie DT, North PC, Oxford AW, Saynor DA, et al. (1997). Naratriptan: Biological Profile in Animal Models Relevant to Migraine. *Cephalalgia* 17: 145-152.

Deleu D, & Hanssens Y (2000). Current and Emerging Second-Generation Triptans in Acute Migraine Therapy: A Comparative Review. *The Journal of Clinical Pharmacology* 40: 687-700.

Dickenson JM, & Hill SJ (1998). Human 5-HT1B receptor stimulated inositol phospholipid hydrolysis in CHO cells: synergy with Gq-coupled receptors. *European Journal of Pharmacology* 348: 279-285.

Dupuis DS, Perez M, Halazy S, Colpaert FC, & Pauwels PJ (1999). Magnitude of 5-HT1B and 5-HT1A receptor activation in guinea-pig and rat brain: evidence from sumatriptan dimer-mediated [<sup>35</sup>S]GTPγS binding responses. *Molecular Brain Research* 67: 107-123.

Ghoneim OM, Ibrahim DA, El-Deeb IM, Lee SH, & Booth RG (2011). A novel potential therapeutic avenue for autism: design, synthesis and pharmacophore generation of SSRIs with dual action. *Bioorganic & medicinal chemistry letters* 21: 6714-6723.

Glennon RA, Lee M, Rangisetty JB, Dukat M, Roth BL, Savage JE, et al. (2000). 2-Substituted Tryptamines: Agents with Selectivity for 5-HT<sub>6</sub> Serotonin Receptors. *Journal of Medicinal Chemistry* 43: 1011-1018.

Goadsby PJ (1998). Serotonin 5-HT<sub>1B/1D</sub> Receptor Agonists in Migraine. *CNS Drugs* 10: 271-286.

Gras J, Llenas J, Jansat JM, Jáuregui J, Cabarrocas X, & Palacios JM (2002). Almotriptan, a New Anti-Migraine Agent: A Review. *CNS Drug Reviews* 8: 217-234.

Hoyer D (1988). Functional Correlates of Serotonin 5-HT<sub>1</sub> Recognition Sites. *Journal of Receptor Research* 8: 59-81.

John GW, Pauwels PJ, Perez M, Halazy S, Le Grand B, Verscheure Y, et al. (1999). F 11356, a Novel 5-Hydroxytryptamine (5-HT) Derivative with Potent, Selective, and Unique High Intrinsic Activity at 5-HT<sub>1B/1D</sub> Receptors in Models Relevant to Migraine. *Journal of Pharmacology and Experimental Therapeutics* 290: 83-95.

Johnson KW, Schaus JM, Durkin MM, Audia JE, Kaldor SW, Flaugh ME, et al. (1997). 5-HT<sub>1F</sub> receptor agonists inhibit neurogenic dural inflammation in guinea pigs. *NeuroReport* 8: 2237-2239.

Knight AR, Misra A, Quirk K, Benwell K, Revell D, Kennett G, et al. (2004). Pharmacological characterisation of the agonist radioligand binding site of 5-HT<sub>2A</sub>, 5-HT<sub>2B</sub> and 5-HT<sub>2C</sub> receptors. *Naunyn-Schmiedeberg's Archives of Pharmacology* 370: 114-123.

Leonhardt S, Herrick-Davis K, & Titeler M (1989). Detection of a Novel Serotonin Receptor Subtype (5-HT<sub>1E</sub>) in Human Brain: Interaction with a GTP-Binding Protein. *Journal of Neurochemistry* 53: 465-471.

Leysen JE, Gommeren W, Heylen L, Luyten WH, Van de Weyer I, Vanhoenacker P, et al. (1996). Alniditan, a new 5-hydroxytryptamine<sub>1D</sub> agonist and migraine-abortive agent: ligand-binding properties of human 5-hydroxytryptamine<sub>1D</sub> alpha, human 5-hydroxytryptamine<sub>1D</sub> beta, and calf 5-

hydroxytryptamine<sub>1D</sub> receptors investigated with [<sup>3</sup>H]5-hydroxytryptamine and [<sup>3</sup>H]alniditan. *Molecular Pharmacology* 50: 1567-1580.

Lovenberg TW, Baron BM, de Lecea L, Miller JD, Prosser RA, Rea MA, et al. (1993). A novel adenylyl cyclase-activating serotonin receptor (5-HT<sub>7</sub>) implicated in the regulation of mammalian circadian rhythms. *Neuron* 11: 449-458.

MaassenVanDenBrink A, Reekers M, Bax WA, Ferrari MD, & Saxena PR (1998). Coronary Side-Effect Potential of Current and Prospective Antimigraine Drugs. *Circulation* 98: 25-30.

MaassenVanDenBrink A, Reekers M, Bax WA, & Saxena PR (2000). Human Isolated Coronary Artery Contraction to Sumatriptan Characterised by the Selective 5-HT<sub>1B/1D</sub> Receptor Antagonist GR55562. *Pharmacology & Toxicology* 86: 287-290.

Martin GR, Robertson AD, MacLennan SJ, Prentice DJ, Barrett VJ, Buckingham J, et al. (1997). Receptor specificity and trigemino-vascular inhibitory actions of a novel 5-HT<sub>1B/1D</sub> receptor partial agonist, 311C90 (zolmitriptan). *British Journal of Pharmacology* 121: 157-164.

McAllister G, Charlesworth A, Snodin C, Beer MS, Noble AJ, Middlemiss DN, et al. (1992). Molecular cloning of a serotonin receptor from human brain (5HT<sub>1E</sub>): a fifth 5HT<sub>1</sub>-like subtype. *Proceedings of the National Academy of Sciences* 89: 5517-5521.

Napier C, Stewart M, Melrose H, Hopkins B, McHarg A, & Wallis R (1999). Characterisation of the 5-HT receptor binding profile of eletriptan and kinetics of [<sup>3</sup>H]eletriptan binding at human 5-HT<sub>1B</sub> and 5-HT<sub>1D</sub> receptors. *European Journal of Pharmacology* 368: 259-268.

Nelson DL, Phebus LA, Johnson KW, Wainscott DB, Cohen ML, Calligaro DO, et al. (2010). Preclinical pharmacological profile of the selective 5-HT<sub>1F</sub> receptor agonist lasmiditan. *Cephalgia* 30: 1159-1169.

Newman-Tancredi A, Conte C, Chaput C, Verrière L, Audinot-Bouchez V, Lochon S, et al. (1997). Agonist activity of antimigraine drugs at recombinant human 5-HT<sub>1A</sub> receptors: potential implications for prophylactic and acute therapy. *Naunyn-Schmiedeberg's Archives of Pharmacology* 355: 682-688.

Parsons AA, Raval P, Smith S, Tilford N, King FD, Kaumann AJ, et al. (1998). Effects of the Novel High-Affinity 5-HT<sub>1B/1D</sub>-Receptor Ligand Frovatriptan in Human Isolated Basilar and Coronary Arteries. *Journal of Cardiovascular Pharmacology* 32: 220-224.

Pauwels PJ, Palmier C, Dupuis DS, & Colpaert FC (1998). Interaction of 5-HT<sub>1B/D</sub> ligands with recombinant h 5-HT<sub>1A</sub> receptors: Intrinsic activity and modulation by G-protein activation state. *Naunyn-Schmiedeberg's Archives of Pharmacology* 357: 490-499.

Pauwels PJ, Palmier C, Wurch T, & Colpaert FC (1996). Pharmacology of cloned human 5-HT<sub>1D</sub> receptor-mediated functional responses in stably transfected rat C6-glia cell lines: further evidence differentiating human 5-HT<sub>1D</sub> and 5-HT<sub>1B</sub> receptors. *Naunyn-Schmiedeberg's Archives of Pharmacology* 353: 144-156.

Pauwels PJ, Tardif S, Palmier C, Wurch T, & Colpaert FC (1997). How Efficacious are 5-HT<sub>1B/D</sub> Receptor Ligands: an Answer from GTP $\gamma$ S Binding Studies with Stably Transfected C6-glia Cell Lines. *Neuropharmacology* 36: 499-512.

Phebus LA, Johnson KW, Zgombick JM, Gilbert PJ, Van Belle K, Mancuso V, et al. (1997). Characterization of LY344864 as a pharmacological tool to study 5-HT<sub>1F</sub> receptors: Binding affinities, brain penetration and activity in the neurogenic dural inflammation model of migraine. *Life Sciences* 61: 2117-2126.

Razzaque Z, Heald MA, Pickard JD, Maskell L, Beer MS, Hill RG, et al. (1999). Vasoconstriction in human isolated middle meningeal arteries: determining the contribution of 5-HT<sub>1B</sub>- and 5-HT<sub>1F</sub>-receptor activation. *British Journal of Clinical Pharmacology* 47: 75-82.

Saxena PR, Vries PD, Wang W, Heiligers JPC, MaassenVanDenBrink A, Bax WA, et al. (1997). Effects of avitriptan, a new 5-HT<sub>1B/1D</sub> receptor agonist, in experimental models predictive of antimigraine activity and coronary side-effect potential. *Naunyn-Schmiedeberg's Archives of Pharmacology* 355: 295-302.

Schmuck K, Ullmer C, Kalkman HO, Probst A, & Lübbert H (1996). Activation of Meningeal 5-HT<sub>2B</sub> Receptors: An Early Step in the Generation of Migraine Headache? *European Journal of Neuroscience* 8: 959-967.

Shen Y, Monsma FJ, Metcalf MA, Jose PA, Hamblin MW, & Sibley DR (1993). Molecular cloning and expression of a 5-hydroxytryptamine<sub>7</sub> serotonin receptor subtype. *Journal of Biological Chemistry* 268: 18200-18204.

Stanton JA, & Beer MS (1997). Characterisation of a cloned human 5-HT<sub>1A</sub> receptor cell line using [<sup>35</sup>S]GTPγS binding. *European Journal of Pharmacology* 320: 267-275.

Sternfeld F, Guiblin AR, Jelley RA, Matassa VG, Reeve AJ, Hunt PA, et al. (1999). Synthesis and Serotonergic Activity of 3-[2-(Pyrrolidin-1-yl)ethyl]indoles: Potent Agonists for the h5-HT<sub>1D</sub> Receptor with High Selectivity over the h5-HT<sub>1B</sub> Receptor. *Journal of Medicinal Chemistry* 42: 677-690.

Street LJ, Baker R, Davey WB, Guiblin AR, Jelley RA, Reeve AJ, et al. (1995). Synthesis and Serotonergic Activity of N,N-Dimethyl-2-[5-(1,2,4-triazol-1-ylmethyl)-1H-indol-3-yl]ethylamine and Analogs: Potent Agonists for 5-HT<sub>1D</sub> Receptors. *Journal of Medicinal Chemistry* 38: 1799-1810.

Vries PD, Villalón CM, & Saxena PR (1999). Pharmacology of triptans. *Emerging Drugs* 4: 107-125.

Wang C, Jiang Y, Ma J, Wu H, Wacker D, Katritch V, et al. (2013). Structural Basis for Molecular Recognition at Serotonin Receptors. *Science* 340: 610-614.

Wurch T, Palmier C, & Pauwels PJ (2000). Induction of a high-affinity ketanserin binding site at the 5-Hydroxytryptamine<sub>1B</sub> receptor by modification of its carboxy-terminal intracellular portion. *Biochemical Pharmacology* 59: 1117-1121.

Xu Y-C, Schaus JM, Walker C, Krushinski J, Adham N, Zgombick JM, et al. (1999). N-Methyl-5-tert-butyltryptamine: A Novel, Highly Potent 5-HT<sub>1D</sub> Receptor Agonist. *Journal of Medicinal Chemistry* 42: 526-531.

Zgombick JM, Schechter LE, Macchi M, Hartig PR, Branchek TA, & Weinshank RL (1992). Human gene S31 encodes the pharmacologically defined serotonin 5-hydroxytryptamine<sub>1E</sub> receptor. *Molecular Pharmacology* 42: 180-185.

Zgombick JM, Weinshank RL, Macchi M, Schechter LE, Branchek TA, & Hartig PR (1991). Expression and pharmacological characterization of a canine 5-hydroxytryptamine<sub>1D</sub> receptor subtype. *Molecular Pharmacology* 40: 1036-1042.

Zhang D, Kohlman D, Krushinski J, Liang S, Ying B-P, Reilly JE, et al. (2004). Design, synthesis and evaluation of bicyclic benzamides as novel 5-HT<sub>1F</sub> receptor agonists. *Bioorganic & Medicinal Chemistry Letters* 14: 6011-6016.
